# Supplementary material for: Regional-scale lateral carbon transport and CO 2 evasion in temperate stream catchments
Source: Copernicus journal article supplement (doi:10.5194/bg-14-5003-2017), 2017-11-08
Supplement: Supplementary file 1 [file bg-14-5003-2017-supplement.zip]

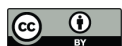

## *Supplement of*

# **Regional-scale lateral carbon transport and CO<sub>2</sub> evasion in temperate stream catchments**

**Katrin Magin et al.**

*Correspondence to:* Katrin Magin ([magi6618@uni-landau.de](mailto:magi6618@uni-landau.de))

- [bg-14-5003-2017-supplement-title-page.pdf](#)
- [Supplementary\\_Figure\\_SamplingFrequencyDIC.pdf](#)
- [Supplementary\\_data.txt](#)

The copyright of individual parts of the supplement might differ from the CC BY 3.0 License.
