# Supplementary figures and images for: Regional-scale lateral carbon transport and CO 2 evasion in temperate stream catchments
Source: Copernicus journal article supplement (doi:10.5194/bg-14-5003-2017), 2017-11-08

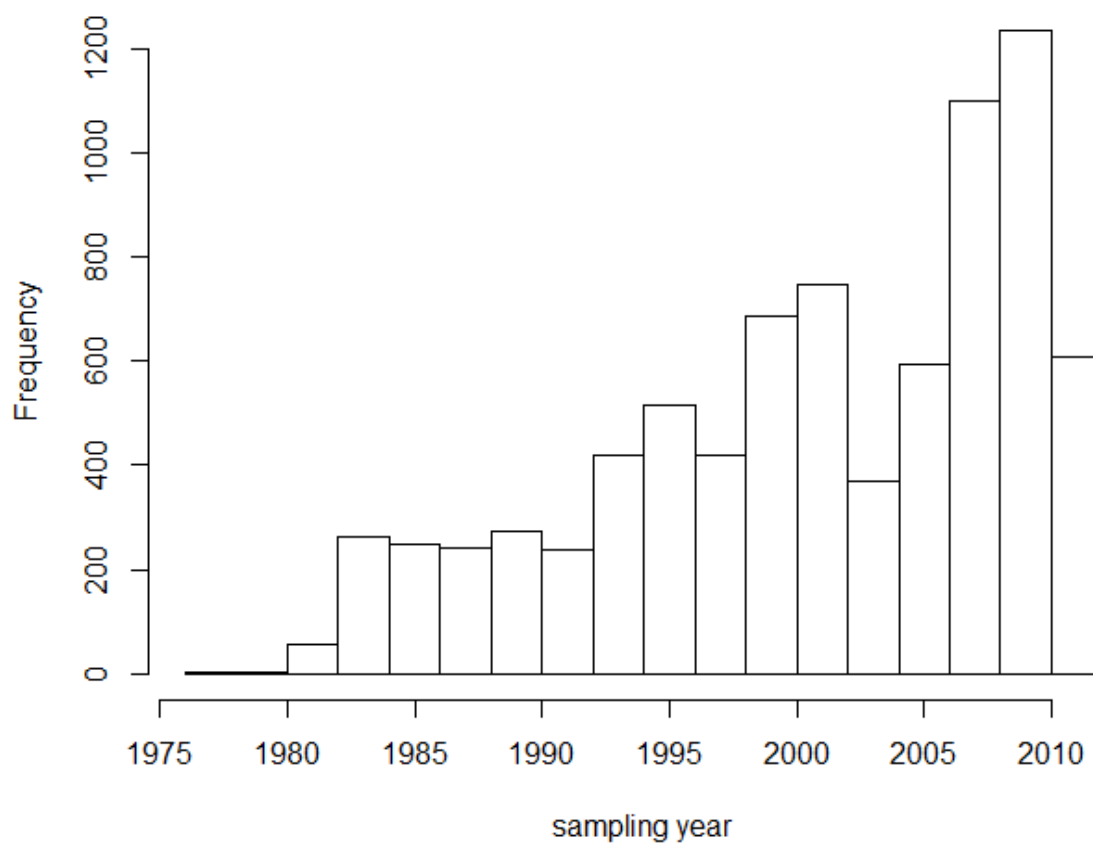

**Supplementary Fig. 1: Sampling frequency for DIC.**

Supplement: Supplementary file 2 [file bg-14-5003-2017-supplement.zip]
